# Supplementary material for: Global Sensitivity of Penman-Monteith Reference Evapotranspiration to Climatic Variables in Mato Grosso, Brazil
Source: Preprints.org preprint supplement (doi:10.20944/preprints202308.0210.v1), 2023-08-03
Supplement: Supplementary file 2 [file supplementary]

**Table S1**: Lower and upper sample limits (Inf - Sup), corresponding to the 2.5th and 97.5th percentiles, of the meteorological variable downward solar radiation (SRD - MJ m-2 day-1) observed in the 33 AWS of Mato Grosso state, Brazil.

| AWS code | Jan | Feb | Mar | Apr | May | Jun | Jul | Aug | Sep | Oct | Nov | Dec |
| --- | --- | --- | --- | --- | --- | --- | --- | --- | --- | --- | --- | --- |
| A-901 | 06,8 - 21,8 | 08,9 - 19,1 | 06,5 - 22,4 | 06,5 - 20,2 | 06,8 - 18,0 | 06,7 - 17,0 | 05,5 - 18,2 | 06,2 - 19,1 | 07,2 - 21,1 | 10,7 - 22,3 | 10,8 - 23,2 | 10,5 - 21,7 |
| A-902 | 17,3 - 24,8 | 15,5 - 23,1 | 16,3 - 21,3 | 14,1 - 19,3 | 13,5 - 18,5 | 15,0 - 21,7 | 12,6 - 19,4 | 16,2 - 21,5 | 16,7 - 21,0 | 14,9 - 20,3 | 16,9 - 23,7 | 16,3 - 25,0 |
| A-903 | 16,3 - 21,7 | 15,0 - 21,2 | 15,0 - 20,6 | 14,4 - 19,9 | 14,1 - 17,9 | 12,6 - 18,8 | 14,5 - 17,7 | 15,9 - 20,8 | 14,3 - 21,2 | 17,2 - 20,9 | 16,1 - 20,3 | 15,3 - 21,4 |
| A-904 | 15,3 - 20,6 | 15,4 - 19,2 | 16,1 - 22,9 | 14,7 - 20,2 | 15,7 - 19,9 | 14,7 - 17,3 | 14,3 - 18,4 | 15,7 - 20,9 | 17,0 - 23,3 | 17,9 - 24,4 | 16,0 - 23,1 | 15,4 - 22,2 |
| A-905 | 14,4 - 20,2 | 14,0 - 18,8 | 15,2 - 22,3 | 12,5 - 18,8 | 12,8 - 17,6 | 11,4 - 16,2 | 12,4 - 16,6 | 14,0 - 18,8 | 14,7 - 21,8 | 14,8 - 21,8 | 15,2 - 20,8 | 16,6 - 21,6 |
| A-906 | 13,0 - 16,8 | 11,6 - 20,1 | 07,4 - 18,0 | 04,1 - 17,9 | 03,0 - 17,4 | 02,6 - 18,0 | 01,9 - 16,9 | 02,9 - 18,5 | 05,8 - 18,5 | 12,4 - 18,8 | 14,0 - 19,5 | 12,1 - 20,8 |
| A-907 | 12,7 - 22,3 | 15,5 - 21,3 | 15,0 - 21,2 | 15,7 - 20,4 | 14,8 - 16,8 | 14,9 - 16,4 | 15,3 - 19,1 | 17,1 - 19,6 | 17,3 - 20,2 | 18,0 - 22,8 | 17,3 - 22,4 | 17,0 - 20,9 |
| A-908 | 15,9 - 22,7 | 17,1 - 20,9 | 17,1 - 21,1 | 16,6 - 20,2 | 14,1 - 18,9 | 09,4 - 18,5 | 09,1 - 19,3 | 10,2 - 21,3 | 11,9 - 23,2 | 15,2 - 23,6 | 16,5 - 23,2 | 17,5 - 21,9 |
| A-910 | 13,9 - 18,9 | 14,8 - 20,4 | 15,8 - 19,6 | 15,1 - 19,5 | 14,6 - 18,8 | 15,9 - 19,2 | 14,5 - 19,0 | 13,4 - 20,8 | 14,2 - 22,8 | 17,2 - 22,9 | 16,4 - 20,7 | 14,2 - 20,3 |
| A-912 | 16,1 - 24,2 | 14,8 - 19,9 | 15,9 - 19,7 | 16,9 - 20,7 | 16,0 - 19,2 | 11,7 - 17,7 | 16,0 - 19,1 | 18,2 - 20,2 | 15,9 - 21,4 | 16,1 - 21,4 | 18,0 - 22,6 | 18,7 - 23,1 |
| A-913 | 16,0 - 19,6 | 15,2 - 20,4 | 15,6 - 19,1 | 14,8 - 18,4 | 14,2 - 18,2 | 14,9 - 18,8 | 15,5 - 19,9 | 17,8 - 21,2 | 17,0 - 23,1 | 18,1 - 22,7 | 16,6 - 20,9 | 16,4 - 21,5 |
| A-914 | 16,2 - 20,4 | 15,0 - 20,5 | 16,0 - 19,4 | 15,1 - 19,2 | 15,4 - 18,4 | 13,9 - 16,9 | 14,6 - 17,3 | 14,7 - 18,9 | 16,6 - 21,4 | 17,6 - 23,6 | 16,9 - 22,2 | 15,7 - 20,9 |
| A-915 | 16,4 - 25,7 | 15,1 - 22,9 | 16,4 - 22,7 | 13,9 - 22,2 | 14,5 - 19,7 | 14,5 - 19,3 | 14,7 - 20,3 | 15,2 - 21,7 | 16,0 - 24,5 | 17,4 - 24,0 | 12,9 - 24,6 | 16,6 - 23,6 |
| A-916 | 15,8 - 21,3 | 15,3 - 20,8 | 16,9 - 21,1 | 16,7 - 21,5 | 16,8 - 19,2 | 13,7 - 19,3 | 17,5 - 19,8 | 18,7 - 21,5 | 18,6 - 24,2 | 17,6 - 23,2 | 17,2 - 23,6 | 17,0 - 23,7 |
| A-917 | 15,5 - 23,5 | 16,1 - 21,4 | 16,7 - 21,7 | 16,8 - 21,5 | 15,5 - 21,2 | 15,6 - 23,2 | 17,9 - 23,3 | 18,1 - 24,1 | 16,6 - 24,5 | 17,7 - 25,3 | 16,8 - 23,9 | 17,0 - 22,1 |
| A-918 | 15,8 - 24,2 | 13,6 - 20,9 | 15,8 - 21,9 | 14,9 - 19,6 | 15,2 - 17,8 | 13,0 - 18,7 | 15,0 - 19,4 | 17,7 - 21,3 | 15,4 - 22,7 | 18,0 - 24,1 | 17,6 - 26,3 | 16,3 - 24,8 |
| A-919 | 12,8 - 17,9 | 12,1 - 19,1 | 14,1 - 18,5 | 14,7 - 18,2 | 14,2 - 17,9 | 15,4 - 18,4 | 16,2 - 18,8 | 13,6 - 20,0 | 12,8 - 21,7 | 13,0 - 21,9 | 11,8 - 20,6 | 13,0 - 18,8 |
| A-920 | 15,0 - 18,8 | 15,2 - 21,3 | 16,5 - 19,1 | 15,1 - 18,1 | 13,9 - 17,7 | 13,8 - 17,0 | 12,8 - 18,9 | 16,0 - 20,7 | 16,4 - 21,9 | 19,2 - 21,9 | 16,8 - 20,5 | 15,9 - 21,3 |
| A-921 | 15,2 - 24,3 | 13,2 - 22,6 | 13,0 - 21,1 | 13,7 - 20,8 | 13,1 - 19,1 | 12,7 - 19,0 | 14,6 - 19,6 | 17,5 - 21,9 | 16,6 - 24,8 | 18,7 - 24,4 | 17,4 - 27,2 | 16,5 - 25,7 |
| A-922 | 07,6 - 22,3 | 05,2 - 19,6 | 11,9 - 21,4 | 08,9 - 19,5 | 07,6 - 17,1 | 06,0 - 18,0 | 10,7 - 18,4 | 16,9 - 19,7 | 16,2 - 20,5 | 14,4 - 19,3 | 13,6 - 21,2 | 10,6 - 20,4 |
| A-924 | 13,6 - 19,5 | 14,7 - 21,4 | 13,8 - 18,7 | 13,6 - 18,6 | 12,4 - 17,6 | 12,0 - 18,2 | 13,2 - 19,2 | 14,8 - 21,1 | 15,4 - 22,5 | 17,5 - 23,2 | 16,0 - 21,7 | 15,9 - 21,5 |
| A-926 | 16,2 - 20,6 | 16,6 - 23,1 | 16,3 - 20,6 | 17,0 - 20,2 | 16,9 - 19,3 | 18,2 - 19,9 | 18,6 - 20,6 | 19,3 - 21,8 | 18,8 - 23,0 | 18,8 - 23,1 | 18,4 - 21,6 | 17,1 - 21,5 |
| A-927 | 18,0 - 23,5 | 16,5 - 22,0 | 16,6 - 21,2 | 16,6 - 21,8 | 12,0 - 25,2 | 16,6 - 22,9 | 21,8 - 29,3 | 23,4 - 28,6 | 18,8 - 24,5 | 19,6 - 24,6 | 17,6 - 23,5 | 18,3 - 23,2 |
| A-928 | 14,9 - 21,1 | 15,2 - 19,8 | 15,7 - 19,5 | 15,9 - 19,1 | 14,9 - 17,2 | 14,5 - 17,0 | 13,6 - 18,0 | 15,6 - 20,2 | 16,5 - 22,3 | 17,5 - 22,2 | 16,4 - 20,3 | 16,2 - 21,0 |
| A-929 | 16,0 - 23,1 | 16,2 - 22,9 | 17,2 - 21,6 | 16,7 - 21,2 | 15,9 - 20,1 | 16,2 - 19,1 | 17,5 - 19,9 | 19,2 - 21,6 | 19,1 - 23,5 | 18,3 - 23,7 | 16,8 - 23,3 | 16,5 - 23,8 |
| A-930 | 16,4 - 24,1 | 16,0 - 23,9 | 16,7 - 21,4 | 17,4 - 21,9 | 17,0 - 19,4 | 16,3 - 19,7 | 16,0 - 20,2 | 16,8 - 21,6 | 17,4 - 23,7 | 18,8 - 23,8 | 17,3 - 24,0 | 18,0 - 22,3 |
| A-931 | 17,2 - 22,6 | 17,6 - 22,3 | 17,3 - 21,5 | 17,4 - 22,3 | 16,0 - 19,7 | 16,5 - 19,2 | 17,2 - 19,4 | 19,1 - 21,1 | 18,7 - 24,0 | 18,9 - 23,6 | 16,4 - 24,1 | 18,4 - 23,6 |
| A-932 | 15,4 - 22,1 | 14,3 - 19,8 | 13,1 - 20,1 | 10,8 - 18,9 | 13,8 - 19,3 | 13,7 - 17,7 | 14,4 - 19,9 | 15,4 - 20,2 | 13,6 - 21,1 | 14,6 - 21,6 | 15,8 - 22,2 | 16,3 - 21,3 |
| A-933 | 17,2 - 23,4 | 17,2 - 21,2 | 15,3 - 21,8 | 16,4 - 20,3 | 15,3 - 18,6 | 13,9 - 17,6 | 15,5 - 18,0 | 16,9 - 19,9 | 18,2 - 23,1 | 19,4 - 23,5 | 18,6 - 24,7 | 18,3 - 23,6 |
| A-934 | 16,5 - 22,7 | 17,4 - 20,4 | 14,8 - 21,9 | 15,9 - 20,1 | 15,5 - 18,6 | 15,2 - 17,4 | 15,9 - 18,0 | 17,2 - 20,7 | 18,1 - 22,4 | 18,0 - 22,9 | 18,1 - 23,8 | 17,5 - 21,9 |
| A-935 | 16,7 - 22,1 | 15,6 - 21,3 | 16,2 - 20,3 | 15,6 - 18,5 | 13,7 - 16,6 | 13,0 - 15,5 | 14,4 - 16,2 | 13,8 - 18,5 | 13,2 - 21,3 | 16,8 - 22,0 | 17,4 - 22,0 | 16,3 - 22,9 |
| A-936 | 16,4 - 20,3 | 14,1 - 19,4 | 14,8 - 20,6 | 14,1 - 18,4 | 12,5 - 17,3 | 13,8 - 17,2 | 14,5 - 18,3 | 16,8 - 20,2 | 16,8 - 22,2 | 17,2 - 21,8 | 15,6 - 21,4 | 14,2 - 19,4 |
| A-937 | 16,7 - 22,2 | 15,4 - 19,7 | 15,3 - 20,6 | 12,7 - 19,2 | 10,5 - 17,6 | 11,9 - 17,1 | 13,9 - 17,6 | 15,5 - 19,7 | 17,4 - 21,5 | 18,6 - 21,8 | 17,2 - 22,0 | 15,7 - 21,8 |

**Table S2:** Lower and upper sample limits (Inf - Sup), corresponding to the 2.5th and 97.5th percentiles, of the meteorological variable relative humidity (RH - %) observed in the 33 AWS of Mato Grosso state, Brazil.

| AWS code | Jan | Feb | Mar | Apr | May | Jun | Jul | Aug | Sep | Oct | Nov | Dec |
| --- | --- | --- | --- | --- | --- | --- | --- | --- | --- | --- | --- | --- |
| A-901 | 70,4 - 80,6 | 74,2 - 82,7 | 74,6 - 83,2 | 70,0 - 81,5 | 57,5 - 74,1 | 53,5 - 70,0 | 44,1 - 65,4 | 38,9 - 52,8 | 37,1 - 57,6 | 59,0 - 69,7 | 64,4 - 79,5 | 68,2 - 83,7 |
| A-902 | 75,7 - 88,3 | 81,6 - 88,5 | 78,8 - 90,6 | 75,2 - 91,3 | 67,6 - 84,4 | 60,2 - 76,0 | 44,5 - 70,3 | 42,2 - 57,6 | 42,2 - 65,3 | 59,9 - 78,1 | 74,9 - 84,5 | 78,0 - 88,6 |
| A-903 | 81,2 - 89,7 | 80,1 - 86,2 | 76,1 - 85,8 | 68,4 - 85,0 | 69,1 - 85,3 | 61,8 - 77,3 | 58,9 - 68,9 | 51,7 - 68,6 | 48,2 - 77,0 | 60,7 - 81,7 | 70,0 - 89,4 | 67,1 - 88,8 |
| A-904 | 74,1 - 83,6 | 74,9 - 83,2 | 73,8 - 81,1 | 68,4 - 79,7 | 60,0 - 73,8 | 51,4 - 66,6 | 43,5 - 55,4 | 40,1 - 51,0 | 44,7 - 62,7 | 60,3 - 73,3 | 67,8 - 81,5 | 72,2 - 82,6 |
| A-905 | 80,5 - 89,9 | 81,9 - 90,7 | 79,8 - 90,2 | 69,5 - 86,9 | 64,2 - 83,2 | 58,1 - 75,4 | 46,7 - 63,5 | 46,3 - 60,8 | 48,2 - 68,9 | 59,7 - 83,2 | 65,5 - 88,5 | 65,7 - 92,1 |
| A-906 | 82,7 - 91,4 | 83,7 - 93,7 | 84,4 - 90,6 | 80,5 - 89,1 | 77,0 - 83,9 | 68,4 - 80,4 | 61,2 - 68,4 | 52,1 - 65,7 | 55,5 - 77,2 | 65,6 - 81,7 | 59,2 - 86,1 | 78,4 - 87,1 |
| A-907 | 71,2 - 83,8 | 76,5 - 83,4 | 73,2 - 84,3 | 69,5 - 80,2 | 63,8 - 76,7 | 59,5 - 77,0 | 51,8 - 67,5 | 41,8 - 55,9 | 35,3 - 65,0 | 47,7 - 76,1 | 52,6 - 81,3 | 62,4 - 82,7 |
| A-908 | 76,0 - 86,8 | 77,4 - 86,2 | 71,3 - 84,7 | 67,5 - 83,8 | 62,2 - 79,3 | 54,0 - 69,7 | 44,3 - 57,1 | 36,4 - 50,0 | 31,5 - 65,8 | 52,1 - 76,1 | 62,2 - 82,8 | 69,0 - 84,3 |
| A-910 | 79,2 - 90,4 | 79,4 - 88,5 | 83,0 - 87,4 | 79,1 - 86,1 | 72,1 - 83,3 | 56,5 - 77,2 | 55,4 - 69,2 | 51,9 - 64,4 | 52,8 - 73,2 | 62,1 - 80,7 | 70,9 - 88,1 | 73,6 - 89,7 |
| A-912 | 77,5 - 87,6 | 80,2 - 86,9 | 77,1 - 88,1 | 67,1 - 84,3 | 68,2 - 80,8 | 57,7 - 72,7 | 42,2 - 62,9 | 40,0 - 56,7 | 36,8 - 68,8 | 59,2 - 80,0 | 64,9 - 84,7 | 77,6 - 86,9 |
| A-913 | 83,8 - 90,9 | 85,0 - 89,2 | 83,1 - 91,7 | 81,7 - 91,3 | 79,9 - 88,7 | 76,6 - 86,0 | 67,6 - 80,9 | 61,1 - 75,6 | 63,7 - 77,7 | 75,4 - 82,4 | 75,5 - 86,7 | 82,5 - 90,3 |
| A-914 | 80,0 - 88,5 | 82,7 - 91,4 | 83,3 - 87,4 | 78,4 - 86,7 | 73,4 - 83,5 | 66,5 - 77,5 | 55,3 - 75,0 | 45,6 - 70,8 | 51,0 - 72,8 | 69,8 - 81,9 | 76,1 - 83,7 | 80,8 - 92,5 |
| A-915 | 79,7 - 88,2 | 81,5 - 85,6 | 77,1 - 85,2 | 71,5 - 85,4 | 61,4 - 81,4 | 54,8 - 72,4 | 50,2 - 60,9 | 44,0 - 56,7 | 40,9 - 71,5 | 60,1 - 75,9 | 72,2 - 82,6 | 76,7 - 85,6 |
| A-916 | 71,0 - 88,4 | 81,4 - 86,4 | 67,9 - 85,2 | 64,4 - 86,1 | 65,5 - 82,8 | 56,3 - 77,6 | 52,2 - 70,9 | 48,1 - 64,3 | 44,6 - 71,8 | 51,3 - 80,5 | 43,3 - 83,9 | 64,4 - 86,6 |
| A-917 | 79,8 - 87,8 | 77,5 - 86,8 | 77,7 - 85,3 | 75,9 - 84,5 | 61,3 - 80,0 | 52,1 - 71,6 | 46,5 - 57,8 | 42,8 - 55,8 | 46,1 - 71,1 | 63,4 - 77,0 | 71,3 - 82,9 | 77,6 - 86,5 |
| A-918 | 64,2 - 84,5 | 76,3 - 88,3 | 69,1 - 87,2 | 63,4 - 85,1 | 65,4 - 79,4 | 49,5 - 70,6 | 41,9 - 58,2 | 33,4 - 51,9 | 32,5 - 67,8 | 48,8 - 80,3 | 46,7 - 84,2 | 62,4 - 85,3 |
| A-919 | 83,3 - 92,3 | 82,9 - 93,2 | 84,7 - 91,1 | 75,0 - 90,9 | 71,8 - 88,1 | 62,5 - 82,9 | 55,7 - 72,8 | 46,6 - 72,3 | 64,4 - 77,8 | 70,7 - 82,4 | 78,4 - 87,2 | 79,6 - 88,4 |
| A-920 | 80,6 - 89,8 | 82,1 - 92,0 | 83,8 - 89,7 | 77,9 - 88,4 | 73,8 - 83,9 | 58,8 - 78,0 | 50,0 - 67,9 | 45,3 - 64,5 | 53,4 - 75,6 | 69,8 - 84,5 | 78,0 - 87,6 | 77,9 - 87,2 |
| A-921 | 69,0 - 85,6 | 77,2 - 85,8 | 67,8 - 85,6 | 72,8 - 86,2 | 68,3 - 80,4 | 61,8 - 75,8 | 50,6 - 66,9 | 46,4 - 60,1 | 41,2 - 68,2 | 60,2 - 81,6 | 50,1 - 83,9 | 61,8 - 85,5 |
| A-922 | 77,9 - 85,3 | 78,0 - 86,1 | 80,1 - 89,2 | 76,2 - 87,8 | 72,9 - 85,4 | 70,3 - 84,0 | 60,9 - 78,7 | 54,7 - 69,1 | 53,4 - 67,2 | 62,5 - 74,0 | 68,4 - 81,8 | 74,6 - 84,4 |
| A-924 | 84,6 - 98,1 | 83,9 - 99,9 | 84,4 - 90,5 | 79,8 - 90,5 | 79,0 - 84,8 | 58,6 - 81,1 | 52,7 - 71,2 | 46,8 - 72,1 | 52,7 - 76,2 | 71,9 - 82,1 | 78,1 - 91,0 | 81,7 - 92,7 |
| A-926 | 78,5 - 86,8 | 72,4 - 87,1 | 78,5 - 85,8 | 75,5 - 85,6 | 72,2 - 81,2 | 59,8 - 73,5 | 49,0 - 59,9 | 43,9 - 60,5 | 54,6 - 74,9 | 59,3 - 79,3 | 61,0 - 85,8 | 72,9 - 86,1 |
| A-927 | 79,4 - 88,9 | 81,6 - 88,1 | 83,7 - 88,4 | 76,5 - 86,8 | 69,8 - 84,6 | 56,6 - 73,8 | 45,5 - 61,6 | 41,1 - 56,7 | 47,4 - 68,1 | 64,2 - 82,4 | 75,3 - 86,5 | 79,5 - 87,3 |
| A-928 | 78,9 - 85,0 | 79,1 - 84,1 | 77,7 - 83,5 | 73,8 - 82,3 | 68,0 - 78,5 | 62,5 - 75,5 | 56,0 - 68,2 | 51,6 - 60,1 | 55,6 - 67,7 | 64,3 - 77,5 | 70,5 - 82,2 | 74,3 - 83,8 |
| A-929 | 79,7 - 87,5 | 77,8 - 88,4 | 75,9 - 85,9 | 69,6 - 82,9 | 60,6 - 79,6 | 52,6 - 69,7 | 43,8 - 54,5 | 35,6 - 51,4 | 30,6 - 67,0 | 44,1 - 76,0 | 56,8 - 86,0 | 74,2 - 86,6 |
| A-930 | 67,8 - 84,0 | 71,4 - 82,7 | 64,7 - 81,9 | 59,9 - 80,6 | 57,5 - 75,4 | 52,6 - 67,1 | 41,6 - 58,3 | 40,5 - 56,6 | 35,5 - 67,9 | 50,5 - 76,0 | 47,4 - 80,1 | 66,8 - 83,7 |
| A-931 | 75,8 - 85,5 | 76,6 - 84,4 | 76,6 - 84,4 | 67,6 - 83,0 | 60,9 - 80,1 | 54,1 - 69,8 | 42,3 - 57,5 | 35,1 - 52,5 | 29,6 - 66,0 | 53,7 - 76,6 | 63,3 - 84,1 | 71,4 - 84,1 |
| A-932 | 72,1 - 84,2 | 74,3 - 83,6 | 73,2 - 85,3 | 63,1 - 82,3 | 56,8 - 75,2 | 52,0 - 70,5 | 43,7 - 61,2 | 37,6 - 49,9 | 32,7 - 66,1 | 51,7 - 71,2 | 55,6 - 81,6 | 72,0 - 83,1 |
| A-933 | 75,3 - 88,2 | 77,9 - 86,7 | 73,1 - 88,4 | 67,7 - 84,4 | 60,9 - 79,9 | 51,9 - 72,2 | 35,8 - 63,8 | 32,9 - 52,5 | 29,3 - 65,0 | 51,9 - 75,7 | 68,2 - 83,9 | 74,1 - 88,8 |
| A-934 | 77,3 - 87,7 | 78,6 - 86,4 | 75,7 - 88,3 | 65,9 - 84,5 | 63,4 - 80,8 | 54,2 - 75,5 | 41,4 - 67,0 | 38,8 - 53,1 | 36,2 - 70,4 | 55,9 - 78,0 | 56,8 - 84,5 | 68,6 - 86,4 |
| A-935 | 78,7 - 84,0 | 80,5 - 86,8 | 80,2 - 85,9 | 76,4 - 84,6 | 72,2 - 83,0 | 69,3 - 81,1 | 65,2 - 77,9 | 55,3 - 67,2 | 53,8 - 70,7 | 63,3 - 75,5 | 67,2 - 83,1 | 74,4 - 84,0 |
| A-936 | 78,7 - 87,5 | 80,9 - 88,4 | 80,9 - 89,7 | 77,1 - 88,3 | 71,7 - 84,7 | 69,4 - 81,2 | 61,5 - 77,1 | 57,4 - 67,0 | 59,3 - 70,9 | 68,0 - 76,8 | 71,5 - 83,9 | 77,2 - 85,3 |
| A-937 | 74,5 - 85,0 | 77,3 - 85,3 | 77,8 - 83,8 | 74,0 - 82,3 | 67,0 - 81,2 | 61,5 - 80,5 | 52,4 - 72,8 | 47,1 - 62,3 | 49,9 - 64,2 | 59,3 - 73,0 | 63,9 - 80,5 | 69,8 - 80,2 |

**Table S3**: Lower and upper sample limits (Inf - Sup), corresponding to the 2.5th and 97.5th percentiles, of the meteorological variable maximum air temperature (Tmax - °C) observed in the 33 AWS of Mato Grosso state, Brazil.

| Código | Jan | Feb | Mar | Apr | May | Jun | Jul | Aug | Sep | Oct | Nov | Dec |
| --- | --- | --- | --- | --- | --- | --- | --- | --- | --- | --- | --- | --- |
| A-901 | 34,7 - 38,0 | 34,6 - 37,3 | 33,3 - 37,8 | 33,9 - 37,9 | 33,5 - 37,0 | 33,5 - 36,9 | 35,4 - 37,2 | 37,9 - 41,3 | 38,9 - 42,0 | 36,6 - 42,1 | 34,7 - 39,8 | 34,8 - 38,7 |
| A-902 | 32,3 - 35,6 | 32,3 - 35,0 | 31,2 - 35,0 | 31,9 - 35,1 | 30,5 - 35,2 | 32,2 - 35,3 | 33,9 - 35,6 | 35,9 - 38,7 | 36,7 - 39,9 | 34,9 - 39,9 | 33,1 - 37,8 | 33,2 - 35,0 |
| A-903 | 33,1 - 36,9 | 33,6 - 36,4 | 33,0 - 35,8 | 32,7 - 35,9 | 32,8 - 35,6 | 32,9 - 35,8 | 34,6 - 36,9 | 37,0 - 39,4 | 37,2 - 40,4 | 35,8 - 40,2 | 31,7 - 38,6 | 32,2 - 37,2 |
| A-904 | 31,4 - 37,1 | 33,1 - 36,2 | 32,5 - 35,6 | 32,8 - 36,4 | 32,9 - 36,2 | 33,4 - 36,0 | 34,7 - 36,4 | 36,5 - 39,2 | 37,9 - 39,7 | 36,0 - 40,6 | 34,1 - 38,8 | 32,6 - 36,8 |
| A-905 | 31,8 - 35,8 | 32,2 - 34,8 | 32,1 - 35,9 | 31,2 - 36,0 | 30,7 - 34,6 | 32,0 - 34,3 | 33,3 - 35,2 | 35,5 - 37,9 | 35,9 - 38,4 | 34,3 - 38,3 | 32,8 - 38,0 | 32,0 - 35,4 |
| A-906 | 33,1 - 35,7 | 33,4 - 35,9 | 32,6 - 35,8 | 32,8 - 35,5 | 33,1 - 36,0 | 34,0 - 35,8 | 35,0 - 36,6 | 37,2 - 39,0 | 36,7 - 39,4 | 34,8 - 39,1 | 34,0 - 36,7 | 33,4 - 37,0 |
| A-907 | 34,1 - 38,3 | 34,5 - 36,5 | 34,3 - 39,9 | 33,8 - 36,9 | 33,1 - 36,8 | 33,2 - 35,7 | 35,1 - 36,7 | 37,2 - 39,9 | 39,0 - 42,3 | 37,9 - 42,0 | 34,8 - 39,0 | 32,3 - 38,1 |
| A-908 | 31,9 - 35,9 | 32,5 - 36,6 | 32,0 - 36,2 | 32,2 - 35,1 | 32,0 - 35,8 | 32,3 - 35,9 | 33,4 - 35,7 | 35,8 - 39,2 | 37,9 - 43,5 | 35,7 - 43,8 | 32,3 - 38,0 | 32,7 - 36,9 |
| A-910 | 32,8 - 35,5 | 32,9 - 35,7 | 32,6 - 36,2 | 33,6 - 36,7 | 33,4 - 36,4 | 33,8 - 36,6 | 35,8 - 37,3 | 36,4 - 38,9 | 37,2 - 38,7 | 35,5 - 38,8 | 34,2 - 37,0 | 33,8 - 35,7 |
| A-912 | 30,5 - 33,6 | 31,0 - 33,9 | 30,6 - 33,2 | 30,3 - 33,6 | 29,4 - 32,0 | 29,8 - 32,2 | 31,0 - 32,8 | 32,8 - 35,8 | 34,6 - 37,3 | 32,9 - 37,3 | 31,7 - 34,9 | 30,7 - 33,1 |
| A-913 | 30,1 - 33,0 | 30,3 - 32,8 | 30,5 - 33,2 | 31,0 - 33,6 | 30,3 - 32,4 | 31,0 - 33,5 | 32,6 - 34,1 | 33,9 - 36,9 | 34,2 - 36,7 | 32,1 - 36,0 | 31,6 - 36,5 | 31,2 - 33,8 |
| A-914 | 32,8 - 36,1 | 33,2 - 36,5 | 32,7 - 37,2 | 33,3 - 36,1 | 33,1 - 36,4 | 33,4 - 36,4 | 34,9 - 37,8 | 37,3 - 40,2 | 37,1 - 40 | 35,7 - 38,6 | 33,7 - 36,6 | 33,6 - 36,6 |
| A-915 | 31,6 - 35,8 | 32,4 - 34,9 | 32,2 - 34,7 | 31,6 - 35,8 | 32,2 - 35,2 | 32,0 - 34,8 | 32,7 - 35,8 | 34,9 - 38,4 | 35,8 - 41,3 | 34,9 - 41,9 | 33,2 - 37,5 | 33,1 - 36,8 |
| A-916 | 32,9 - 36,4 | 33,4 - 36,7 | 33,2 - 36,8 | 33,2 - 37,1 | 33,1 - 36,5 | 32,8 - 36,9 | 34,0 - 37,8 | 36,8 - 40,2 | 38,0 - 41,2 | 36,0 - 42,5 | 34,2 - 37,9 | 34,1 - 38,2 |
| A-917 | 32,3 - 35,9 | 32,6 - 36,7 | 32,5 - 35,8 | 32,3 - 36,0 | 32,9 - 36,5 | 33,8 - 35,9 | 34,6 - 36,6 | 36,4 - 38,9 | 37,1 - 40,5 | 35,4 - 41,4 | 33,8 - 38,6 | 32,4 - 37,1 |
| A-918 | 33,9 - 40,0 | 33,5 - 37,1 | 33,8 - 37,7 | 33,3 - 36,6 | 34,0 - 36,7 | 33,3 - 36,3 | 34,8 - 37,0 | 37,8 - 40,7 | 38,4 - 42,2 | 35,3 - 43,4 | 34,7 - 41,6 | 33,8 - 39,0 |
| A-919 | 31,6 - 35,7 | 32,6 - 35,3 | 31,5 - 35,0 | 32,3 - 34,7 | 32,7 - 34,7 | 33,2 - 35,7 | 34,1 - 36,9 | 35,9 - 38,8 | 36,3 - 38,5 | 34,8 - 37,6 | 32,9 - 35,7 | 33,3 - 35,5 |
| A-920 | 31,7 - 34,2 | 31,6 - 34,2 | 31,1 - 33,9 | 31,8 - 34,2 | 31,9 - 35,8 | 32,0 - 34,4 | 33,7 - 35,4 | 35,6 - 37,5 | 35,1 - 37,7 | 33,9 - 38,0 | 32,7 - 35,2 | 31,2 - 34,6 |
| A-921 | 34,0 - 40,5 | 33,9 - 37,7 | 34,1 - 36,8 | 32,9 - 37,1 | 33,3 - 37,1 | 33,2 - 37,3 | 34,6 - 38,9 | 37,6 - 40,0 | 39,0 - 41,9 | 35,4 - 44,4 | 34,5 - 41,1 | 34,7 - 39,4 |
| A-922 | 34,0 - 37,1 | 33,3 - 35,6 | 34,6 - 39,1 | 33,3 - 36,7 | 33,2 - 36,8 | 33,8 - 36,4 | 35,2 - 37,1 | 36,0 - 40,1 | 38,1 - 40,8 | 37,1 - 40,7 | 35,3 - 39,9 | 35,0 - 37,4 |
| A-924 | 32,1 - 34,8 | 32,4 - 35,5 | 31,5 - 34,2 | 32,4 - 34,9 | 31,9 - 35,3 | 32,1 - 35,6 | 34,1 - 36,8 | 35,7 - 38,2 | 36,1 - 38,7 | 34,4 - 38,4 | 33,0 - 37,1 | 32,1 - 35,8 |
| A-926 | 31,9 - 34,4 | 30,5 - 33,6 | 31,9 - 34,6 | 31,3 - 34,6 | 32,3 - 35,0 | 32,3 - 35,0 | 33,6 - 35,9 | 36,0 - 38,0 | 35,2 - 38,1 | 33,6 - 38,0 | 32,2 - 35,2 | 31,1 - 34,6 |
| A-927 | 31,3 - 33,9 | 31,0 - 34,0 | 31,3 - 36,1 | 31,3 - 35,4 | 31,0 - 35,1 | 32,2 - 35,4 | 34,1 - 36,0 | 35,6 - 37,7 | 36,1 - 38,7 | 34,3 - 38,5 | 32,4 - 35,4 | 31,9 - 34,7 |
| A-928 | 32,6 - 40,2 | 32,7 - 40,2 | 31,9 - 40,2 | 32,7 - 40,2 | 33,3 - 40,1 | 33,2 - 37,9 | 34,5 - 38,0 | 36,6 - 38,8 | 36,9 - 39,9 | 35,3 - 40,2 | 34,4 - 39,9 | 33,4 - 38,2 |
| A-929 | 31,0 - 35,3 | 32,0 - 34,8 | 31,9 - 35,8 | 32,0 - 36,2 | 31,6 - 34,8 | 32,7 - 34,8 | 33,9 - 36,0 | 36,1 - 38,2 | 36,6 - 39,7 | 35,6 - 41,1 | 33,3 - 37,7 | 31,6 - 37,0 |
| A-930 | 33,8 - 37,6 | 32,8 - 37,4 | 32,7 - 36,5 | 33,3 - 37,7 | 33,3 - 36,4 | 33,0 - 36,2 | 34,7 - 37,8 | 36,3 - 40,6 | 38,0 - 43,0 | 35,9 - 41,8 | 33,7 - 39,0 | 33,7 - 38,2 |
| A-931 | 31,3 - 35,0 | 31,5 - 34,9 | 31,2 - 34,6 | 30,4 - 34,2 | 31,3 - 33,4 | 31,3 - 33,3 | 31,8 - 34,0 | 34,8 - 37,4 | 36,1 - 40,1 | 34,7 - 41,0 | 32,3 - 38,0 | 31,8 - 36,0 |
| A-932 | 33,7 - 37,2 | 33,3 - 37,2 | 33,0 - 36,6 | 32,7 - 36,8 | 32,2 - 35,6 | 32,4 - 35,0 | 33,9 - 36,1 | 35,9 - 39,5 | 37,5 - 41,6 | 35,9 - 42,5 | 35,1 - 39,5 | 33,7 - 38,6 |
| A-933 | 32,4 - 35,7 | 31,7 - 36,0 | 30,8 - 36,2 | 31,4 - 35,2 | 31,1 - 33,8 | 31,2 - 36,8 | 32,2 - 35,8 | 35,3 - 38,5 | 37,1 - 39,0 | 34,7 - 38,8 | 32,7 - 36,7 | 32,9 - 35,6 |
| A-934 | 31,0 - 35,3 | 30,8 - 35,4 | 30,7 - 33,2 | 30,1 - 33,5 | 29,2 - 31,9 | 29,0 - 31,3 | 29,7 - 32,5 | 32,2 - 35,6 | 34,1 - 36,5 | 32,8 - 36,7 | 31,5 - 35,2 | 31,2 - 34,4 |
| A-935 | 34,9 - 36,9 | 33,6 - 36,8 | 32,5 - 37,0 | 33,3 - 38,1 | 33,3 - 37,5 | 33,7 - 36,9 | 35,5 - 37,4 | 37,8 - 40,5 | 38,5 - 41,4 | 36,6 - 41,5 | 35,6 - 40,1 | 34,6 - 38,8 |
| A-936 | 32,6 - 37,1 | 32,6 - 36,5 | 32,8 - 36,3 | 32,7 - 36,6 | 33,2 - 36,0 | 33,2 - 36,3 | 35,0 - 36,7 | 37,0 - 39,7 | 37,7 - 40,8 | 36,0 - 39,9 | 34,6 - 37,4 | 34,2 - 36,3 |
| A-937 | 33,2 - 37,7 | 33,5 - 36,8 | 33,8 - 36,9 | 34,0 - 37,6 | 33,9 - 35,6 | 33,6 - 36,0 | 35,2 - 37,8 | 36,3 - 40,3 | 37,6 - 40,6 | 36,9 - 40,5 | 34,9 - 39,8 | 34,4 - 38,1 |

**Table S4**: Lower and upper sample limits (Inf - Sup), corresponding to the 2.5th and 97.5th percentiles, of the meteorological variable minimum air temperature (Tmin - °C) observed in the 33 AWS of Mato Grosso state, Brazil.

| Código | Janeiro | Fevereiro | Março | Abril | Maio | Junho | Julho | Agosto | Setembro | Outubro | Novembro | Dezembro |
| --- | --- | --- | --- | --- | --- | --- | --- | --- | --- | --- | --- | --- |
| A-901 | 17,8 - 22,9 | 19,9 - 22,1 | 19,1 - 22,3 | 16,8 - 21,2 | 14,4 - 19,9 | 14,4 - 18,3 | 13,5 - 17,3 | 15,5 - 19,2 | 16,7 - 21,4 | 17,0 - 21,6 | 19,2 - 23,2 | 17,7 - 22,3 |
| A-902 | 16,7 - 21,1 | 18,2 - 21,3 | 16,8 - 21,2 | 16,2 - 20,7 | 15,4 - 18,4 | 15,1 - 17,2 | 13,3 - 16,9 | 15,4 - 17,9 | 16,3 - 20,4 | 16,1 - 20,9 | 16,5 - 21,1 | 16,6 - 20,2 |
| A-903 | 18,9 - 22,0 | 18,7 - 21,9 | 18,9 - 21,7 | 13,0 - 21,2 | 10,7 - 17,9 | 12,5 - 16,3 | 08,0 - 14,4 | 11,6 - 15,1 | 14,3 - 19,0 | 16,5 - 20,8 | 17,8 - 21,2 | 18,3 - 21,5 |
| A-904 | 18,6 - 21,6 | 18,2 - 21,4 | 17,6 - 21,5 | 15,2 - 20,6 | 14,0 - 19,8 | 14,8 - 17,7 | 13,8 - 17,3 | 14,4 - 17,7 | 15,5 - 19,8 | 17,9 - 21,0 | 18,2 - 21,1 | 17,1 - 21,3 |
| A-905 | 17,0 - 20,3 | 18,3 - 20,7 | 16,9 - 21,2 | 15,8 - 19,9 | 14,4 - 18,7 | 15,6 - 17,2 | 11,5 - 17,1 | 14,0 - 17,8 | 16,2 - 20,0 | 16,8 - 20,5 | 17,3 - 20,8 | 16,2 - 20,8 |
| A-906 | 19,5 - 21,0 | 19,8 - 21,2 | 20,0 - 21,7 | 18,2 - 21,4 | 17,5 - 20,2 | 17,5 - 19,2 | 17,5 - 19,2 | 17,5 - 19,2 | 17,5 - 19,6 | 18,3 - 20,9 | 19,8 - 21,3 | 19,2 - 21,4 |
| A-907 | 14,9 - 22,0 | 19,3 - 22,0 | 18,4 - 21,9 | 14,1 - 20,8 | 09,0 - 18,3 | 11,6 - 16,8 | 10,4 - 14,7 | 13,3 - 14,8 | 13,7 - 18,2 | 14,9 - 22,5 | 16,9 - 21,9 | 15,3 - 23,2 |
| A-908 | 18,1 - 20,7 | 18,3 - 20,3 | 18,1 - 20,8 | 15,6 - 20,5 | 15,6 - 17,6 | 15,6 - 16,6 | 15,6 - 15,8 | 15,6 - 16,2 | 15,6 - 18,8 | 15,9 - 20,7 | 16,9 - 20,9 | 18,6 - 20,5 |
| A-910 | 20,1 - 22,1 | 20,7 - 22,3 | 20,8 - 22,6 | 16,6 - 22,3 | 15,8 - 21,2 | 16,6 - 19,1 | 15,3 - 19,0 | 16,0 - 19,0 | 17,4 - 21,0 | 20,1 - 21,7 | 20,3 - 22,0 | 20,0 - 21,7 |
| A-912 | 16,3 - 19,3 | 17,3 - 19,7 | 17,1 - 19,8 | 15,2 - 18,6 | 13,1 - 16,8 | 13,6 - 16,2 | 12,9 - 15,5 | 14,6 - 15,9 | 15,4 - 18,8 | 15,9 - 19,5 | 16,8 - 19,2 | 15,4 - 19,0 |
| A-913 | 15,1 - 18,7 | 16,7 - 19,4 | 11,9 - 19,2 | 12,0 - 17,9 | 11,9 - 18,0 | 12,0 - 17,7 | 11,8 - 17,1 | 11,9 - 16,4 | 12,3 - 20,0 | 13,2 - 19,7 | 14,3 - 19,2 | 12,7 - 19,1 |
| A-914 | 20,4 - 23,5 | 20,2 - 24,0 | 20,5 - 21,5 | 13,2 - 21,4 | 10,8 - 20,1 | 13,5 - 17,6 | 06,7 - 17,5 | 11,1 - 17,7 | 15,6 - 19,7 | 18,8 - 21,5 | 19,8 - 22,2 | 17,4 - 22,4 |
| A-915 | 16,7 - 21,1 | 18,2 - 20,0 | 18,0 - 20,5 | 11,9 - 19,9 | 08,2 - 17,5 | 10,5 - 15,7 | 07,8 - 15,1 | 09,4 - 15,7 | 11,5 - 19,7 | 15,5 - 20,6 | 18,2 - 20,8 | 17,2 - 20,7 |
| A-916 | 18,2 - 21,0 | 18,4 - 20,0 | 16,3 - 21,3 | 16,2 - 20,6 | 15,3 - 18,0 | 15,3 - 16,4 | 15,3 - 15,7 | 15,3 - 15,8 | 15,3 - 19,3 | 16,2 - 20,1 | 15,7 - 21,0 | 18,2 - 20,5 |
| A-917 | 18,5 - 21,2 | 18,5 - 20,6 | 19,1 - 21,3 | 14,1 - 20,5 | 12,0 - 18,5 | 13,5 - 17,7 | 11,7 - 16,4 | 12,6 - 16,3 | 14,4 - 17,9 | 18,2 - 20,8 | 18,2 - 21,3 | 17,0 - 20,7 |
| A-918 | 19,6 - 23,7 | 18,5 - 22,5 | 17,4 - 22,1 | 16,7 - 21,5 | 10,8 - 20,1 | 09,7 - 17,9 | 09,0 - 17,6 | 09,7 - 17,7 | 09,3 - 20,7 | 16,7 - 22,7 | 18,8 - 21,7 | 20,0 - 22,7 |
| A-919 | 19,9 - 21,6 | 19,7 - 21,8 | 19,6 - 21,5 | 14,4 - 20,8 | 13,1 - 20,3 | 15,2 - 18,5 | 09,6 - 18,2 | 13,3 - 18,6 | 17,0 - 20,0 | 19,4 - 21,5 | 18,8 - 21,4 | 19,9 - 21,3 |
| A-920 | 19,8 - 21,3 | 19,3 - 21,6 | 19,4 - 21,3 | 15,7 - 20,9 | 15,6 - 19,3 | 16,5 - 18,5 | 14,0 - 17,6 | 15,6 - 19,7 | 17,3 - 20,2 | 18,3 - 20,6 | 19,2 - 21,2 | 18,3 - 21,1 |
| A-921 | 19,5 - 23,8 | 19,9 - 22,9 | 19,6 - 22,2 | 16,4 - 22,0 | 11,0 - 20,5 | 10,1 - 18,8 | 08,3 - 17,9 | 10,2 - 18,9 | 09,8 - 20,6 | 15,6 - 21,9 | 17,4 - 22,2 | 17,5 - 21,5 |
| A-922 | 16,6 - 21,8 | 18,8 - 22,1 | 16,3 - 22,2 | 15,2 - 22,0 | 15,2 - 20 | 15,1 - 17,1 | 14,9 - 16,2 | 15,2 - 16,3 | 15,2 - 18,4 | 15,2 - 20,5 | 15,4 - 22,0 | 15,8 - 21,8 |
| A-924 | 19,7 - 21,3 | 18,5 - 21,2 | 19,5 - 22,1 | 14,3 - 21,2 | 12,6 - 21,5 | 14,1 - 17,2 | 12,0 - 17,4 | 13,3 - 17,2 | 15,0 - 18,7 | 17,6 - 21,0 | 19,2 - 21,0 | 19,6 - 20,9 |
| A-926 | 19,1 - 20,9 | 18,1 - 20,9 | 19,1 - 20,8 | 17,4 - 21,0 | 17,2 - 20,4 | 17,2 - 17,9 | 17,2 - 17,6 | 17,2 - 17,8 | 17,4 - 20,2 | 17,7 - 20,2 | 19,2 - 21,1 | 19,2 - 21,2 |
| A-927 | 18,3 - 20,6 | 18,4 - 21,1 | 19,0 - 20,8 | 14,4 - 20,5 | 14,0 - 18,9 | 15,4 - 18,9 | 11,8 - 17,4 | 14,0 - 19,0 | 16,9 - 21,2 | 17,1 - 21,1 | 18,7 - 20,9 | 18,7 - 20,6 |
| A-928 | 19,1 - 21,7 | 19,3 - 22,5 | 20,1 - 22,3 | 12,8 - 21,0 | 11,2 - 18,3 | 13,0 - 17,2 | 08,6 - 15,9 | 11,7 - 16,4 | 14,3 - 19,6 | 17,5 - 21,2 | 16,7 - 21,3 | 15,8 - 22,3 |
| A-929 | 18,0 - 20,9 | 18,0 - 20,6 | 17,8 - 20,8 | 13,5 - 19,9 | 11,8 - 17,6 | 12,3 - 16,7 | 11,6 - 15,2 | 12,3 - 16,1 | 13,2 - 17,5 | 15,1 - 21,1 | 18,4 - 20,7 | 16,6 - 20,2 |
| A-930 | 19,2 - 21,7 | 18,8 - 21,3 | 18,8 - 21,9 | 16,9 - 21,5 | 16,6 - 19,4 | 16,6 - 18,2 | 16,6 - 16,8 | 16,6 - 17,8 | 16,6 - 19,6 | 16,7 - 20,6 | 19,7 - 21,3 | 18,8 - 21,3 |
| A-931 | 16,5 - 20,7 | 17,3 - 19,5 | 17,3 - 19,9 | 12,2 - 19,2 | 08,8 - 16,0 | 10,2 - 15,7 | 07,6 - 14,2 | 09,7 - 14,3 | 11,7 - 18,4 | 15,1 - 20,6 | 17,5 - 19,7 | 15,4 - 19,4 |
| A-932 | 17,0 - 22,1 | 19,8 - 21,8 | 19,5 - 21,9 | 15,7 - 21,0 | 9,7 - 19,5 | 11,6 - 18,1 | 09,5 - 15,8 | 13,3 - 16,4 | 13,6 - 20,0 | 15,8 - 21,7 | 19,7 - 21,8 | 15,3 - 21,3 |
| A-933 | 15,9 - 20,0 | 18,4 - 20,7 | 17,5 - 20,5 | 15,7 - 19,7 | 12,3 - 18,1 | 13,1 - 16,4 | 13,0 - 16,6 | 14,7 - 16,6 | 15,7 - 18,4 | 15,8 - 20,3 | 17,2 - 19,7 | 15,9 - 20,0 |
| A-934 | 14,1 - 18,5 | 16,5 - 18,4 | 15,8 - 18,6 | 12,1 - 18,0 | 08,7 - 15,3 | 10,6 - 13,0 | 09,0 - 13,7 | 11,7 - 14,4 | 12,2 - 15,8 | 13,0 - 18,3 | 13,3 - 18,5 | 13,9 - 18,0 |
| A-935 | 16,6 - 22,1 | 20,5 - 22,3 | 18,9 - 22,7 | 15,1 - 22,5 | 14,7 - 19,3 | 14,5 - 17,8 | 13,0 - 16,2 | 14,7 - 17,5 | 14,9 - 20,9 | 16,4 - 22,5 | 18,0 - 22,4 | 15,4 - 22,4 |
| A-936 | 15,2 - 21,7 | 19,2 - 21,4 | 16,4 - 20,8 | 15,6 - 21,2 | 15,1 - 19,0 | 15,1 - 18,0 | 13,2 - 16,3 | 14,1 - 16,5 | 15,1 - 18,7 | 15,4 - 21,8 | 15,8 - 21,9 | 16,3 - 21,1 |
| A-937 | 17,0 - 21,8 | 19,4 - 21,5 | 16,0 - 22,1 | 15,9 - 20,8 | 15,8 - 18,3 | 15,8 - 18,0 | 14,5 - 16,8 | 14,6 - 17,0 | 15,9 - 19,4 | 16,6 - 20,8 | 15,8 - 21,8 | 15,8 - 21,4 |

**Table S5**: Lower and upper sample limits (Inf - Sup), corresponding to the 2.5th and 97.5th percentiles, of the meteorological variable Wind speed at 2 m. (WS - m s-1) observed in the 33 AWS of Mato Grosso state, Brazil.

| Código | Janeiro | Fevereiro | Março | Abril | Maio | Junho | Julho | Agosto | Setembro | Outubro | Novembro | Dezembro |
| --- | --- | --- | --- | --- | --- | --- | --- | --- | --- | --- | --- | --- |
| A-901 | 0,9 - 1,6 | 0,7 - 1,5 | 0,7 - 1,3 | 0,8 - 1,3 | 0,9 - 1,4 | 1,0 - 1,3 | 1,0 - 1,4 | 1,1 - 1,6 | 1,1 - 1,5 | 0,9 - 1,6 | 1,1 - 1,6 | 0,7 - 1,5 |
| A-902 | 1,3 - 2,0 | 1,1 - 1,6 | 1,1 - 1,6 | 0,9 - 1,7 | 1,1 - 2,0 | 1,7 - 2,2 | 1,6 - 2,4 | 1,6 - 2,5 | 1,4 - 2,5 | 1,1 - 2,3 | 1,3 - 2,3 | 1,1 - 2,2 |
| A-903 | 0,6 - 1,1 | 0,5 - 0,9 | 0,5 - 1,0 | 0,5 - 0,9 | 0,4 - 1,2 | 0,5 - 1,3 | 0,6 - 1,4 | 0,6 - 1,3 | 0,6 - 1,2 | 0,7 - 1,2 | 0,6 - 1,2 | 0,6 - 1,1 |
| A-904 | 0,3 - 1,5 | 0,4 - 1,5 | 0,5 - 1,3 | 0,4 - 1,5 | 0,4 - 1,8 | 0,5 - 1,9 | 0,7 - 2,0 | 0,6 - 2,2 | 0,6 - 2,1 | 0,5 - 1,6 | 0,4 - 1,7 | 0,3 - 1,6 |
| A-905 | 0,9 - 1,4 | 0,9 - 1,3 | 0,9 - 1,2 | 0,9 - 1,3 | 1,0 - 1,4 | 1,0 - 1,4 | 1,0 - 1,6 | 1,3 - 1,7 | 1,1 - 1,5 | 1,1 - 1,5 | 1,1 - 1,5 | 1,1 - 1,6 |
| A-906 | 0,2 - 1,0 | 0,1 - 0,8 | 0,1 - 0,6 | 0,2 - 0,5 | 0,2 - 0,6 | 0,2 - 0,8 | 0,2 - 1,0 | 0,4 - 1,3 | 0,2 - 1,0 | 0,2 - 0,8 | 0,1 - 1,1 | 0,2 - 0,9 |
| A-907 | 0,5 - 1,1 | 0,7 - 1,3 | 0,7 - 1,2 | 0,6 - 1,1 | 0,5 - 1,0 | 0,5 - 1,0 | 0,7 - 1,2 | 1,0 - 1,3 | 1,0 - 1,5 | 1,0 - 1,5 | 0,8 - 1,4 | 0,8 - 1,4 |
| A-908 | 1,1 - 2,1 | 1,0 - 2,0 | 0,9 - 1,6 | 1,0 - 1,6 | 1,2 - 1,9 | 1 - 2,1,0 | 1,6 - 2,3 | 1,9 - 2,5 | 1,8 - 2,4 | 1,6 - 2,1 | 1,5 - 2,0 | 1,3 - 2,0 |
| A-910 | 0,3 - 0,8 | 0,3 - 0,7 | 0,3 - 0,7 | 0,3 - 0,8 | 0,4 - 0,8 | 0,5 - 0,8 | 0,5 - 0,8 | 0,4 - 0,9 | 0,4 - 0,8 | 0,4 - 0,9 | 0,3 - 0,8 | 0,3 - 0,9 |
| A-912 | 0,9 - 2,7 | 1,7 - 2,4 | 1,5 - 2,2 | 1,0 - 1,9 | 1,0 - 2,1 | 1,1 - 2,1 | 1,6 - 2,3 | 1,9 - 2,6 | 1,6 - 2,5 | 1,6 - 2,4 | 1,7 - 2,4 | 1,6 - 2,3 |
| A-913 | 0,8 - 1,4 | 0,8 - 1,3 | 0,5 - 1,1 | 0,5 - 1,1 | 0,7 - 1,1 | 0,6 - 1,2 | 0,5 - 1,5 | 1,0 - 1,4 | 0,8 - 1,3 | 0,6 - 1,4 | 0,4 - 1,3 | 0,5 - 1,4 |
| A-914 | 0,6 - 1,2 | 0,6 - 1,1 | 0,5 - 1,0 | 0,6 - 0,9 | 0,6 - 0,9 | 0,7 - 1,0 | 0,7 - 1,2 | 0,7 - 1,2 | 0,8 - 1,1 | 0,4 - 1,1 | 0,6 - 1,2 | 0,6 - 1,1 |
| A-915 | 0,9 - 1,5 | 1,0 - 1,6 | 0,8 - 1,3 | 0,8 - 1,4 | 0,9 - 1,5 | 1,0 - 1,6 | 1,1 - 1,9 | 1,3 - 1,8 | 1,2 - 1,8 | 1,1 - 1,6 | 1,0 - 1,6 | 1,0 - 1,5 |
| A-916 | 0,7 - 1,1 | 0,5 - 1,2 | 0,6 - 1,1 | 0,5 - 1,0 | 0,4 - 1,3 | 0,6 - 1,4 | 0,6 - 1,5 | 0,6 - 1,5 | 0,7 - 1,6 | 0,7 - 1,3 | 0,4 - 0,9 | 0,6 - 1,2 |
| A-917 | 0,8 - 1,5 | 0,6 - 1,5 | 0,7 - 1,4 | 0,6 - 1,2 | 0,6 - 1,6 | 0,7 - 1,8 | 0,9 - 2,1 | 1,0 - 2,0 | 1,0 - 1,8 | 1,1 - 1,6 | 0,9 - 1,5 | 0,9 - 1,4 |
| A-918 | 0,7 - 1,5 | 0,8 - 1,3 | 0,7 - 1,1 | 0,7 - 1,3 | 0,7 - 1,4 | 0,8 - 1,7 | 0,8 - 1,6 | 1,1 - 1,6 | 1,0 - 1,6 | 0,8 - 1,5 | 0,8 - 1,5 | 0,7 - 1,5 |
| A-919 | 0,6 - 0,9 | 0,5 - 0,9 | 0,4 - 0,8 | 0,6 - 0,8 | 0,7 - 0,9 | 0,7 - 1,0 | 0,8 - 1,0 | 0,8 - 0,9 | 0,7 - 0,9 | 0,7 - 0,9 | 0,6 - 0,9 | 0,6 - 0,9 |
| A-920 | 0,4 - 0,9 | 0,5 - 0,8 | 0,4 - 0,8 | 0,5 - 0,9 | 0,5 - 1,0 | 0,6 - 1,1 | 0,7 - 1,3 | 0,6 - 1,2 | 0,6 - 1,0 | 0,5 - 0,9 | 0,4 - 1,0 | 0,5 - 0,9 |
| A-921 | 0,7 - 1,3 | 0,6 - 1,2 | 0,7 - 1,1 | 0,6 - 1,0 | 0,6 - 1,2 | 0,8 - 1,4 | 1,0 - 1,7 | 1,0 - 1,6 | 1,2 - 1,7 | 0,8 - 1,4 | 0,7 - 1,4 | 0,7 - 1,2 |
| A-922 | 0,7 - 1,3 | 0,8 - 1,2 | 0,7 - 1,1 | 0,6 - 1,1 | 0,6 - 1,2 | 0,6 - 1,2 | 0,7 - 1,1 | 0,9 - 1,2 | 0,8 - 1,5 | 1,0 - 1,4 | 0,8 - 1,5 | 0,7 - 1,4 |
| A-924 | 0,9 - 1,2 | 0,9 - 1,2 | 0,8 - 1,1 | 0,8 - 1,1 | 0,7 - 1,3 | 1,0 - 1,5 | 1,1 - 1,7 | 1,0 - 1,6 | 0,9 - 1,5 | 1,0 - 1,3 | 0,9 - 1,3 | 0,9 - 1,2 |
| A-926 | 0,7 - 1,4 | 0,7 - 1,2 | 0,6 - 1,1 | 0,5 - 1,1 | 0,7 - 1,3 | 0,8 - 1,4 | 1,0 - 1,6 | 0,9 - 1,6 | 0,9 - 1,3 | 0,9 - 1,2 | 0,9 - 1,4 | 0,8 - 1,5 |
| A-927 | 0,8 - 1,8 | 1,1 - 1,8 | 1,0 - 1,6 | 0,6 - 1,6 | 0,7 - 1,9 | 1,5 - 2,2 | 1,5 - 2,3 | 1,5 - 2,3 | 1,2 - 2,3 | 0,8 - 2,2 | 1,1 - 1,9 | 1,2 - 1,9 |
| A-928 | 0,5 - 1,1 | 0,4 - 1,1 | 0,5 - 0,9 | 0,4 - 1,0 | 0,5 - 0,9 | 0,5 - 1,1 | 0,7 - 1,3 | 0,5 - 1,1 | 0,6 - 1,2 | 0,5 - 1,2 | 0,4 - 1,2 | 0,5 - 1,1 |
| A-929 | 0,9 - 2,0 | 1,0 - 2,1 | 0,7 - 1,8 | 0,9 - 1,8 | 1,1 - 2,1 | 0,9 - 2,3 | 0,8 - 2,6 | 0,9 - 2,8 | 0,9 - 2,5 | 0,5 - 2,2 | 0,7 - 1,9 | 1,0 - 2,0 |
| A-930 | 0,5 - 1,1 | 0,5 - 1,0 | 0,5 - 1,0 | 0,5 - 1,0 | 0,6 - 1,1 | 0,6 - 1,3 | 0,7 - 1,3 | 0,7 - 1,5 | 0,7 - 1,3 | 0,6 - 1,3 | 0,5 - 1,2 | 0,5 - 1,2 |
| A-931 | 1,2 - 2,0 | 0,6 - 1,9 | 0,6 - 1,7 | 0,9 - 1,8 | 0,9 - 1,8 | 1,0 - 2,4 | 1,4 - 2,5 | 1,8 - 2,6 | 1,8 - 2,5 | 1,3 - 2,4 | 1,4 - 2,2 | 1,2 - 2,2 |
| A-932 | 0,3 - 0,8 | 0,3 - 1,0 | 0,3 - 1,0 | 0,3 - 0,8 | 0,4 - 0,8 | 0,4 - 0,9 | 0,4 - 1,0 | 0,4 - 1,2 | 0,4 - 1,1 | 0,4 - 1,1 | 0,4 - 0,9 | 0,4 - 0,8 |
| A-933 | 0,2 - 1,5 | 0,2 - 1,2 | 0,1 - 1,4 | 0,4 - 1,4 | 0,4 - 1,7 | 0,2 - 1,5 | 0,2 - 1,9 | 0,5 - 2,2 | 0,8 - 3,4 | 0,5 - 1,6 | 0,3 - 1,5 | 0,0 - 1,3 |
| A-934 | 1,5 - 2,3 | 1,4 - 2,1 | 1,2 - 2,1 | 0,9 - 1,9 | 1,3 - 2,0 | 1,4 - 2,0 | 1,5 - 2,1 | 1,7 - 2,3 | 1,7 - 2,5 | 1,6 - 2,4 | 1,5 - 2,3 | 1,5 - 2,1 |
| A-935 | 0,7 - 0,9 | 0,6 - 0,9 | 0,5 - 0,8 | 0,5 - 0,8 | 0,5 - 0,8 | 0,6 - 1,1 | 0,6 - 1,2 | 0,7 - 1,2 | 0,7 - 1,1 | 0,7 - 1,1 | 0,7 - 1,0 | 0,6 - 1,0 |
| A-936 | 0,7 - 1,2 | 0,5 - 1,2 | 0,6 - 1,1 | 0,5 - 1,1 | 0,6 - 1,1 | 0,8 - 1,2 | 0,9 - 1,4 | 1,1 - 1,4 | 1,0 - 1,4 | 0,8 - 1,4 | 0,7 - 1,4 | 0,6 - 1,3 |
| A-937 | 0,4 - 1,0 | 0,5 - 1,0 | 0,4 - 0,8 | 0,5 - 1,0 | 0,7 - 1,0 | 0,6 - 1,1 | 0,6 - 1,2 | 0,6 - 1,2 | 0,8 - 1,2 | 0,7 - 1,3 | 0,8 - 1,1 | 0,7 - 1,1 |
